# Supplementary material
Source: publisher figshare collection journal article supplement (https://acs.figshare.com/ndownloader/files/5121028)
Supplement: Supplementary file 1 [file 5121028]

data_Compound_1b
_publ_requested_journal          Organometallics
_publ_contact_author_name        'Juan Campora'
_publ_contact_author_address     
;Instituto de Investigaciones Quimicas
c/ Americo Vespucio, 49 
41092 Sevilla
Spain
;
_publ_contact_author_email       campora@iiq.csic.es
_publ_contact_author_phone       +34954489555
_publ_contact_author_fax         +34954489555
loop_
_publ_author_name
_publ_author_address
'Juan Campora'
; Instituto de Investigaciones Quimicas
c/ Americo Vespucio, 49 
41092 Sevilla
Spain
;

_audit_creation_method           SHELXL-97
_chemical_name_systematic        
;
 ?
;
_chemical_name_common            ?
_chemical_melting_point          ?
_chemical_formula_moiety         ?
_chemical_formula_sum            'C15 H35 F Ni P2'
_chemical_formula_weight         355.08

loop_
_atom_type_symbol
_atom_type_description
_atom_type_scat_dispersion_real
_atom_type_scat_dispersion_imag
_atom_type_scat_source
Ni Ni -3.0029 0.5091 'International Tables Vol C Tables 4.2.6.8 and 6.1.1.4'
P P 0.2955 0.4335 'International Tables Vol C Tables 4.2.6.8 and 6.1.1.4'
F F 0.0727 0.0534 'International Tables Vol C Tables 4.2.6.8 and 6.1.1.4'
C C 0.0181 0.0091 'International Tables Vol C Tables 4.2.6.8 and 6.1.1.4'
H H 0.0000 0.0000 'International Tables Vol C Tables 4.2.6.8 and 6.1.1.4'

_symmetry_cell_setting           monoclinic
_symmetry_space_group_name_H-M   P21/c

loop_
_symmetry_equiv_pos_as_xyz
'x, y, z'
'-x, y+1/2, -z+1/2'
'-x, -y, -z'
'x, -y-1/2, z-1/2'

_cell_length_a                   7.727(3)
_cell_length_b                   13.228(5)
_cell_length_c                   18.666(5)
_cell_angle_alpha                90.00
_cell_angle_beta                 96.02(5)
_cell_angle_gamma                90.00
_cell_volume                     1897.4(11)
_cell_formula_units_Z            4
_cell_measurement_temperature    173(2)
_cell_measurement_reflns_used    30
_cell_measurement_theta_min      18
_cell_measurement_theta_max      36

_exptl_crystal_description       prismatic
_exptl_crystal_colour            ?????
_exptl_crystal_size_max          0.20
_exptl_crystal_size_mid          0.12
_exptl_crystal_size_min          0.10
_exptl_crystal_density_meas      ?
_exptl_crystal_density_diffrn    1.243
_exptl_crystal_density_method    'not measured'
_exptl_crystal_F_000             768
_exptl_absorpt_coefficient_mu    3.034
_exptl_absorpt_correction_type   refdelf
_exptl_absorpt_correction_T_min  0.2023
_exptl_absorpt_correction_T_max  0.7354
_exptl_absorpt_process_details   ?

_exptl_special_details           
;
Parkin S,Moezzi B & Hope H, (1995) J. Appl. Cryst. 28, 53-56
Cubic fit to sin(theta)/lambda - 24 parameters
;

_diffrn_ambient_temperature      173(2)
_diffrn_radiation_wavelength     1.5418
_diffrn_radiation_type           CuK\a
_diffrn_radiation_source         'fine-focus sealed tube'
_diffrn_radiation_monochromator  graphite
_diffrn_measurement_device_type  'Enraf Nonius CAD 4'
_diffrn_measurement_method       '\q/2\q scan'
_diffrn_detector_area_resol_mean ?
_diffrn_standards_number         1
_diffrn_standards_interval_count 100
_diffrn_standards_interval_time  ?
_diffrn_standards_decay_%        ?
_diffrn_reflns_number            2757
_diffrn_reflns_av_R_equivalents  0.0000
_diffrn_reflns_av_sigmaI/netI    0.0192
_diffrn_reflns_limit_h_min       -8
_diffrn_reflns_limit_h_max       8
_diffrn_reflns_limit_k_min       0
_diffrn_reflns_limit_k_max       14
_diffrn_reflns_limit_l_min       0
_diffrn_reflns_limit_l_max       20
_diffrn_reflns_theta_min         4.10
_diffrn_reflns_theta_max         60.00
_reflns_number_total             2757
_reflns_number_gt                2488
_reflns_threshold_expression     >2sigma(I)

_computing_data_collection       ?
_computing_cell_refinement       ?
_computing_data_reduction        ?
_computing_structure_solution    ?
_computing_structure_refinement  'SHELXL-97 (Sheldrick, 1997)'
_computing_molecular_graphics    ?
_computing_publication_material  ?

_refine_special_details          
;
 Refinement of F^2^ against ALL reflections.  The weighted R-factor wR and
 goodness of fit S are based on F^2^, conventional R-factors R are based
 on F, with F set to zero for negative F^2^. The threshold expression of
 F^2^ > 2sigma(F^2^) is used only for calculating R-factors(gt) etc. and is
 not relevant to the choice of reflections for refinement.  R-factors based
 on F^2^ are statistically about twice as large as those based on F, and R-
 factors based on ALL data will be even larger.
;

_refine_ls_structure_factor_coef Fsqd
_refine_ls_matrix_type           full
_refine_ls_weighting_scheme      calc
_refine_ls_weighting_details     
'calc w=1/[\s^2^(Fo^2^)+(0.1383P)^2^+1.8235P] where P=(Fo^2^+2Fc^2^)/3'
_atom_sites_solution_primary     direct
_atom_sites_solution_secondary   difmap
_atom_sites_solution_hydrogens   geom
_refine_ls_hydrogen_treatment    mixed
_refine_ls_extinction_method     none
_refine_ls_extinction_coef       ?
_refine_ls_number_reflns         2757
_refine_ls_number_parameters     172
_refine_ls_number_restraints     0
_refine_ls_R_factor_all          0.0640
_refine_ls_R_factor_gt           0.0581
_refine_ls_wR_factor_ref         0.1890
_refine_ls_wR_factor_gt          0.1701
_refine_ls_goodness_of_fit_ref   1.078
_refine_ls_restrained_S_all      1.078
_refine_ls_shift/su_max          0.000
_refine_ls_shift/su_mean         0.000

loop_
_atom_site_label
_atom_site_type_symbol
_atom_site_fract_x
_atom_site_fract_y
_atom_site_fract_z
_atom_site_U_iso_or_equiv
_atom_site_adp_type
_atom_site_occupancy
_atom_site_symmetry_multiplicity
_atom_site_calc_flag
_atom_site_refinement_flags
_atom_site_disorder_assembly
_atom_site_disorder_group
Ni1 Ni 0.93432(8) 0.35771(5) 0.28236(3) 0.0314(3) Uani 1 1 d . . .
P1 P 0.77351(13) 0.46488(8) 0.32645(5) 0.0318(3) Uani 1 1 d . . .
P2 P 0.87476(13) 0.42939(7) 0.17636(5) 0.0312(3) Uani 1 1 d . . .
F1 F 1.0658(3) 0.25970(18) 0.24136(14) 0.0438(6) Uani 1 1 d . . .
C1 C 1.0022(6) 0.3009(3) 0.3776(2) 0.0439(11) Uani 1 1 d . . .
H1A H 0.9497 0.3394 0.4132 0.066 Uiso 1 1 calc R . .
H1B H 1.1265 0.3034 0.3877 0.066 Uiso 1 1 calc R . .
H1C H 0.9637 0.2320 0.3788 0.066 Uiso 1 1 calc R . .
C2 C 0.7067(5) 0.5645(3) 0.2598(2) 0.0327(9) Uani 1 1 d . . .
H2A H 0.5910 0.5879 0.2671 0.039 Uiso 1 1 calc R . .
H2B H 0.7857 0.6214 0.2673 0.039 Uiso 1 1 calc R . .
C3 C 0.7065(5) 0.5266(3) 0.1820(2) 0.0331(9) Uani 1 1 d . . .
H3A H 0.7282 0.5829 0.1508 0.040 Uiso 1 1 calc R . .
H3B H 0.5933 0.4986 0.1656 0.040 Uiso 1 1 calc R . .
C4 C 0.7939(5) 0.3474(3) 0.1000(2) 0.0376(10) Uani 1 1 d . . .
H4 H 0.8909 0.3035 0.0902 0.045 Uiso 1 1 calc R . .
C5 C 0.7409(7) 0.4068(4) 0.0306(3) 0.0555(13) Uani 1 1 d . . .
H5A H 0.8356 0.4492 0.0198 0.083 Uiso 1 1 calc R . .
H5B H 0.6413 0.4480 0.0369 0.083 Uiso 1 1 calc R . .
H5C H 0.7124 0.3604 -0.0084 0.083 Uiso 1 1 calc R . .
C6 C 0.6465(6) 0.2779(4) 0.1190(3) 0.0477(11) Uani 1 1 d . . .
H6A H 0.6835 0.2414 0.1623 0.072 Uiso 1 1 calc R . .
H6B H 0.6176 0.2310 0.0803 0.072 Uiso 1 1 calc R . .
H6C H 0.5460 0.3179 0.1261 0.072 Uiso 1 1 calc R . .
C7 C 1.0625(5) 0.4952(3) 0.1438(2) 0.0356(9) Uani 1 1 d . . .
H7 H 1.0193 0.5404 0.1044 0.043 Uiso 1 1 calc R . .
C8 C 1.1566(6) 0.5589(3) 0.2043(3) 0.0443(11) Uani 1 1 d . . .
H8A H 1.0765 0.6064 0.2215 0.066 Uiso 1 1 calc R . .
H8B H 1.2510 0.5948 0.1863 0.066 Uiso 1 1 calc R . .
H8C H 1.2013 0.5155 0.2432 0.066 Uiso 1 1 calc R . .
C9 C 1.1875(6) 0.4190(3) 0.1152(3) 0.0432(11) Uani 1 1 d . . .
H9A H 1.1267 0.3802 0.0770 0.065 Uiso 1 1 calc R . .
H9B H 1.2319 0.3745 0.1534 0.065 Uiso 1 1 calc R . .
H9C H 1.2824 0.4544 0.0972 0.065 Uiso 1 1 calc R . .
C10 C 0.8654(6) 0.5386(3) 0.4061(2) 0.0389(10) Uani 1 1 d . . .
H10 H 0.8778 0.4924 0.4474 0.047 Uiso 1 1 calc R . .
C11 C 0.7472(7) 0.6245(4) 0.4246(3) 0.0591(14) Uani 1 1 d . . .
H11A H 0.6345 0.5980 0.4316 0.089 Uiso 1 1 calc R . .
H11B H 0.7360 0.6726 0.3859 0.089 Uiso 1 1 calc R . .
H11C H 0.7963 0.6571 0.4680 0.089 Uiso 1 1 calc R . .
C12 C 1.0464(6) 0.5766(4) 0.3950(2) 0.0458(11) Uani 1 1 d . . .
H12A H 1.1179 0.5207 0.3838 0.069 Uiso 1 1 calc R . .
H12B H 1.0971 0.6091 0.4382 0.069 Uiso 1 1 calc R . .
H12C H 1.0382 0.6242 0.3559 0.069 Uiso 1 1 calc R . .
C13 C 0.5648(5) 0.4133(3) 0.3513(2) 0.0395(10) Uani 1 1 d . . .
H13 H 0.4854 0.4706 0.3541 0.047 Uiso 1 1 calc R . .
C14 C 0.5797(7) 0.3607(5) 0.4243(3) 0.0654(16) Uani 1 1 d . . .
H14A H 0.6307 0.4061 0.4606 0.098 Uiso 1 1 calc R . .
H14B H 0.6518 0.3018 0.4227 0.098 Uiso 1 1 calc R . .
H14C H 0.4661 0.3410 0.4355 0.098 Uiso 1 1 calc R . .
C15 C 0.4848(7) 0.3447(4) 0.2926(3) 0.0548(13) Uani 1 1 d . . .
H15A H 0.4779 0.3795 0.2473 0.082 Uiso 1 1 calc R . .
H15B H 0.3700 0.3256 0.3028 0.082 Uiso 1 1 calc R . .
H15C H 0.5553 0.2853 0.2904 0.082 Uiso 1 1 calc R . .

loop_
_atom_site_aniso_label
_atom_site_aniso_U_11
_atom_site_aniso_U_22
_atom_site_aniso_U_33
_atom_site_aniso_U_23
_atom_site_aniso_U_13
_atom_site_aniso_U_12
Ni1 0.0312(5) 0.0295(4) 0.0336(5) 0.0023(3) 0.0035(3) 0.0011(3)
P1 0.0307(6) 0.0341(6) 0.0311(6) 0.0009(4) 0.0046(4) -0.0001(4)
P2 0.0298(6) 0.0319(6) 0.0318(6) 0.0011(4) 0.0033(4) 0.0007(4)
F1 0.0473(14) 0.0344(12) 0.0509(15) 0.0009(11) 0.0104(11) 0.0110(11)
C1 0.053(3) 0.041(2) 0.037(2) 0.0045(19) -0.004(2) 0.005(2)
C2 0.030(2) 0.034(2) 0.033(2) 0.0022(17) -0.0015(17) 0.0029(16)
C3 0.031(2) 0.033(2) 0.034(2) 0.0018(17) -0.0007(17) 0.0019(16)
C4 0.035(2) 0.041(2) 0.036(2) -0.0042(18) 0.0006(18) -0.0002(18)
C5 0.073(3) 0.057(3) 0.035(3) -0.004(2) -0.004(2) 0.002(3)
C6 0.037(2) 0.051(3) 0.055(3) -0.013(2) 0.004(2) -0.005(2)
C7 0.033(2) 0.036(2) 0.038(2) 0.0071(18) 0.0087(18) 0.0006(17)
C8 0.035(2) 0.047(3) 0.052(3) -0.003(2) 0.005(2) -0.0066(19)
C9 0.038(2) 0.047(2) 0.047(3) 0.000(2) 0.013(2) 0.0004(19)
C10 0.044(2) 0.041(2) 0.031(2) -0.0032(18) -0.0002(19) 0.0004(19)
C11 0.070(4) 0.055(3) 0.052(3) -0.017(2) 0.002(3) 0.006(3)
C12 0.047(3) 0.048(3) 0.040(3) 0.000(2) -0.006(2) -0.009(2)
C13 0.031(2) 0.048(2) 0.041(2) 0.004(2) 0.0087(19) -0.0006(18)
C14 0.048(3) 0.092(4) 0.059(4) 0.019(3) 0.014(3) -0.019(3)
C15 0.046(3) 0.064(3) 0.056(3) 0.000(2) 0.011(2) -0.017(2)

_geom_special_details            
;
 All esds (except the esd in the dihedral angle between two l.s. planes)
 are estimated using the full covariance matrix.  The cell esds are taken
 into account individually in the estimation of esds in distances, angles
 and torsion angles; correlations between esds in cell parameters are only
 used when they are defined by crystal symmetry.  An approximate (isotropic)
 treatment of cell esds is used for estimating esds involving l.s. planes.
;

loop_
_geom_bond_atom_site_label_1
_geom_bond_atom_site_label_2
_geom_bond_distance
_geom_bond_site_symmetry_2
_geom_bond_publ_flag
Ni1 F1 1.860(2) . ?
Ni1 C1 1.950(4) . ?
Ni1 P1 2.1085(13) . ?
Ni1 P2 2.1988(13) . ?
P1 C13 1.854(4) . ?
P1 C10 1.856(4) . ?
P1 C2 1.849(4) . ?
P2 C7 1.848(4) . ?
P2 C3 1.840(4) . ?
P2 C4 1.847(4) . ?
C2 C3 1.536(6) . ?
C4 C6 1.535(6) . ?
C4 C5 1.533(6) . ?
C7 C9 1.531(6) . ?
C7 C8 1.530(6) . ?
C10 C12 1.521(6) . ?
C10 C11 1.520(6) . ?
C13 C14 1.523(7) . ?
C13 C15 1.504(7) . ?

loop_
_geom_angle_atom_site_label_1
_geom_angle_atom_site_label_2
_geom_angle_atom_site_label_3
_geom_angle
_geom_angle_site_symmetry_1
_geom_angle_site_symmetry_3
_geom_angle_publ_flag
F1 Ni1 C1 90.02(16) . . ?
F1 Ni1 P1 177.00(9) . . ?
C1 Ni1 P1 90.93(14) . . ?
F1 Ni1 P2 90.12(9) . . ?
C1 Ni1 P2 175.69(15) . . ?
P1 Ni1 P2 89.14(5) . . ?
C13 P1 C10 105.2(2) . . ?
C13 P1 C2 104.0(2) . . ?
C10 P1 C2 102.80(19) . . ?
C13 P1 Ni1 114.44(15) . . ?
C10 P1 Ni1 118.31(15) . . ?
C2 P1 Ni1 110.54(13) . . ?
C7 P2 C3 105.83(19) . . ?
C7 P2 C4 103.69(19) . . ?
C3 P2 C4 105.70(19) . . ?
C7 P2 Ni1 113.65(14) . . ?
C3 P2 Ni1 109.43(14) . . ?
C4 P2 Ni1 117.61(15) . . ?
C3 C2 P1 112.1(3) . . ?
C2 C3 P2 110.6(3) . . ?
C6 C4 C5 111.3(4) . . ?
C6 C4 P2 111.9(3) . . ?
C5 C4 P2 113.0(3) . . ?
C9 C7 C8 110.6(3) . . ?
C9 C7 P2 110.5(3) . . ?
C8 C7 P2 110.2(3) . . ?
C12 C10 C11 111.5(4) . . ?
C12 C10 P1 110.1(3) . . ?
C11 C10 P1 112.7(3) . . ?
C14 C13 C15 111.2(4) . . ?
C14 C13 P1 113.9(3) . . ?
C15 C13 P1 110.0(3) . . ?

_diffrn_measured_fraction_theta_max 0.979
_diffrn_reflns_theta_full        60.00
_diffrn_measured_fraction_theta_full 0.979
_refine_diff_density_max         0.933
_refine_diff_density_min         -1.063
_refine_diff_density_rms         0.118

#===END

data_compound_2
_publ_requested_journal          Organometallics
_publ_contact_author_name        'Juan Campora'
_publ_contact_author_address     
;Instituto de Investigaciones Quimicas
c/ Americo Vespucio, 49 
41092 Sevilla
Spain
;
_publ_contact_author_email       campora@iiq.csic.es
_publ_contact_author_phone       +34954489555
_publ_contact_author_fax         +34954489555
loop_
_publ_author_name
_publ_author_address
'Juan Campora'
; Instituto de Investigaciones Quimicas
c/ Americo Vespucio, 49 
41092 Sevilla
Spain
;

_audit_creation_method           SHELXL-97
_chemical_name_systematic        
;
 ?
;
_chemical_name_common            ?
_chemical_melting_point          ?
_chemical_formula_moiety         ?
_chemical_formula_sum            'C15 H36 Ni O P2'
_chemical_formula_weight         353.09

loop_
_atom_type_symbol
_atom_type_description
_atom_type_scat_dispersion_real
_atom_type_scat_dispersion_imag
_atom_type_scat_source
Ni Ni -3.0029 0.5091 'International Tables Vol C Tables 4.2.6.8 and 6.1.1.4'
P P 0.2955 0.4335 'International Tables Vol C Tables 4.2.6.8 and 6.1.1.4'
O O 0.0492 0.0322 'International Tables Vol C Tables 4.2.6.8 and 6.1.1.4'
C C 0.0181 0.0091 'International Tables Vol C Tables 4.2.6.8 and 6.1.1.4'
H H 0.0000 0.0000 'International Tables Vol C Tables 4.2.6.8 and 6.1.1.4'

_symmetry_cell_setting           triclinic
_symmetry_space_group_name_H-M   P-1

loop_
_symmetry_equiv_pos_as_xyz
'x, y, z'
'-x, -y, -z'

_cell_length_a                   7.523(3)
_cell_length_b                   18.015(5)
_cell_length_c                   7.514(3)
_cell_angle_alpha                90.03(3)
_cell_angle_beta                 108.20(5)
_cell_angle_gamma                101.82(4)
_cell_volume                     944.6(6)
_cell_formula_units_Z            2
_cell_measurement_temperature    173(2)
_cell_measurement_reflns_used    25
_cell_measurement_theta_min      18
_cell_measurement_theta_max      37

_exptl_crystal_description       prismatic
_exptl_crystal_colour            ?????
_exptl_crystal_size_max          0.22
_exptl_crystal_size_mid          0.18
_exptl_crystal_size_min          0.15
_exptl_crystal_density_meas      ?
_exptl_crystal_density_diffrn    1.241
_exptl_crystal_density_method    'not measured'
_exptl_crystal_F_000             384
_exptl_absorpt_coefficient_mu    3.006
_exptl_absorpt_correction_type   refdelf
_exptl_absorpt_correction_T_min  0.3138
_exptl_absorpt_correction_T_max  0.8256
_exptl_absorpt_process_details   ?

_exptl_special_details           
;
Parkin S,Moezzi B & Hope H, (1995) J. Appl. Cryst. 28, 53-56
Cubic fit to sin(theta)/lambda - 24 parameters
;

_diffrn_ambient_temperature      173(2)
_diffrn_radiation_wavelength     1.5418
_diffrn_radiation_type           CuK\a
_diffrn_radiation_source         'fine-focus sealed tube'
_diffrn_radiation_monochromator  graphite
_diffrn_measurement_device_type  'Enraf Nonius CAD 4'
_diffrn_measurement_method       '\q/2\q scan'
_diffrn_detector_area_resol_mean ?
_diffrn_standards_number         1
_diffrn_standards_interval_count 100
_diffrn_standards_interval_time  ?
_diffrn_standards_decay_%        ?
_diffrn_reflns_number            2810
_diffrn_reflns_av_R_equivalents  0.0000
_diffrn_reflns_av_sigmaI/netI    0.0398
_diffrn_reflns_limit_h_min       -8
_diffrn_reflns_limit_h_max       7
_diffrn_reflns_limit_k_min       -20
_diffrn_reflns_limit_k_max       20
_diffrn_reflns_limit_l_min       0
_diffrn_reflns_limit_l_max       8
_diffrn_reflns_theta_min         5.03
_diffrn_reflns_theta_max         60.00
_reflns_number_total             2810
_reflns_number_gt                2192
_reflns_threshold_expression     >2sigma(I)

_computing_data_collection       ?
_computing_cell_refinement       ?
_computing_data_reduction        ?
_computing_structure_solution    ?
_computing_structure_refinement  'SHELXL-97 (Sheldrick, 1997)'
_computing_molecular_graphics    ?
_computing_publication_material  ?

_refine_special_details          
;
 Refinement of F^2^ against ALL reflections.  The weighted R-factor wR and
 goodness of fit S are based on F^2^, conventional R-factors R are based
 on F, with F set to zero for negative F^2^. The threshold expression of
 F^2^ > 2sigma(F^2^) is used only for calculating R-factors(gt) etc. and is
 not relevant to the choice of reflections for refinement.  R-factors based
 on F^2^ are statistically about twice as large as those based on F, and R-
 factors based on ALL data will be even larger.
;

_refine_ls_structure_factor_coef Fsqd
_refine_ls_matrix_type           full
_refine_ls_weighting_scheme      calc
_refine_ls_weighting_details     
'calc w=1/[\s^2^(Fo^2^)+(0.1169P)^2^+0.4452P] where P=(Fo^2^+2Fc^2^)/3'
_atom_sites_solution_primary     direct
_atom_sites_solution_secondary   difmap
_atom_sites_solution_hydrogens   geom
_refine_ls_hydrogen_treatment    mixed
_refine_ls_extinction_method     none
_refine_ls_extinction_coef       ?
_refine_ls_number_reflns         2810
_refine_ls_number_parameters     176
_refine_ls_number_restraints     0
_refine_ls_R_factor_all          0.0777
_refine_ls_R_factor_gt           0.0595
_refine_ls_wR_factor_ref         0.1725
_refine_ls_wR_factor_gt          0.1582
_refine_ls_goodness_of_fit_ref   1.037
_refine_ls_restrained_S_all      1.037
_refine_ls_shift/su_max          0.002
_refine_ls_shift/su_mean         0.000

loop_
_atom_site_label
_atom_site_type_symbol
_atom_site_fract_x
_atom_site_fract_y
_atom_site_fract_z
_atom_site_U_iso_or_equiv
_atom_site_adp_type
_atom_site_occupancy
_atom_site_symmetry_multiplicity
_atom_site_calc_flag
_atom_site_refinement_flags
_atom_site_disorder_assembly
_atom_site_disorder_group
Ni1 Ni 0.19267(11) 0.22818(4) 0.49141(10) 0.0274(3) Uani 1 1 d . . .
P1 P 0.08977(16) 0.17600(6) 0.70340(16) 0.0266(3) Uani 1 1 d . . .
P2 P 0.18477(17) 0.33840(6) 0.60394(17) 0.0286(3) Uani 1 1 d . . .
O1 O 0.3048(6) 0.2787(2) 0.3217(6) 0.0456(10) Uani 1 1 d . . .
C1 C 0.1694(8) 0.1289(3) 0.3699(7) 0.0399(12) Uani 1 1 d . . .
H1A H 0.1113 0.0896 0.4331 0.060 Uiso 1 1 calc R . .
H1B H 0.2943 0.1220 0.3762 0.060 Uiso 1 1 calc R . .
H1C H 0.0911 0.1265 0.2409 0.060 Uiso 1 1 calc R . .
C2 C 0.0194(7) 0.2464(3) 0.8346(7) 0.0331(11) Uani 1 1 d . . .
H2A H -0.1174 0.2433 0.7821 0.040 Uiso 1 1 calc R . .
H2B H 0.0469 0.2342 0.9648 0.040 Uiso 1 1 calc R . .
C3 C 0.1275(7) 0.3280(3) 0.8251(7) 0.0313(11) Uani 1 1 d . . .
H3A H 0.2452 0.3400 0.9305 0.038 Uiso 1 1 calc R . .
H3B H 0.0493 0.3635 0.8342 0.038 Uiso 1 1 calc R . .
C4 C -0.0042(7) 0.3825(3) 0.4483(8) 0.0371(12) Uani 1 1 d . . .
H4 H -0.0148 0.4265 0.5182 0.045 Uiso 1 1 calc R . .
C5 C -0.1967(8) 0.3259(3) 0.3908(9) 0.0493(15) Uani 1 1 d . . .
H5A H -0.2272 0.3093 0.5012 0.074 Uiso 1 1 calc R . .
H5B H -0.1894 0.2830 0.3199 0.074 Uiso 1 1 calc R . .
H5C H -0.2946 0.3499 0.3152 0.074 Uiso 1 1 calc R . .
C6 C 0.0476(10) 0.4100(4) 0.2751(8) 0.0541(16) Uani 1 1 d . . .
H6A H 0.1690 0.4455 0.3136 0.081 Uiso 1 1 calc R . .
H6B H -0.0492 0.4345 0.1992 0.081 Uiso 1 1 calc R . .
H6C H 0.0556 0.3674 0.2035 0.081 Uiso 1 1 calc R . .
C7 C 0.4038(7) 0.4134(3) 0.6567(7) 0.0366(12) Uani 1 1 d . . .
H7 H 0.4301 0.4228 0.5379 0.044 Uiso 1 1 calc R . .
C8 C 0.3831(8) 0.4891(3) 0.7326(9) 0.0467(14) Uani 1 1 d . . .
H8A H 0.2765 0.5051 0.6455 0.070 Uiso 1 1 calc R . .
H8B H 0.4982 0.5269 0.7481 0.070 Uiso 1 1 calc R . .
H8C H 0.3617 0.4827 0.8516 0.070 Uiso 1 1 calc R . .
C9 C 0.5762(7) 0.3869(3) 0.7889(8) 0.0452(14) Uani 1 1 d . . .
H9A H 0.5877 0.3401 0.7368 0.068 Uiso 1 1 calc R . .
H9B H 0.5582 0.3790 0.9091 0.068 Uiso 1 1 calc R . .
H9C H 0.6907 0.4249 0.8038 0.068 Uiso 1 1 calc R . .
C10 C -0.1220(7) 0.0963(3) 0.6375(7) 0.0350(12) Uani 1 1 d . . .
H10 H -0.0836 0.0538 0.5890 0.042 Uiso 1 1 calc R . .
C11 C -0.2842(8) 0.1159(3) 0.4772(9) 0.0504(15) Uani 1 1 d . . .
H11A H -0.2369 0.1335 0.3765 0.076 Uiso 1 1 calc R . .
H11B H -0.3327 0.1551 0.5212 0.076 Uiso 1 1 calc R . .
H11C H -0.3853 0.0715 0.4328 0.076 Uiso 1 1 calc R . .
C12 C -0.1894(8) 0.0683(3) 0.8017(9) 0.0479(14) Uani 1 1 d . . .
H12A H -0.0840 0.0565 0.9000 0.072 Uiso 1 1 calc R . .
H12B H -0.2897 0.0234 0.7604 0.072 Uiso 1 1 calc R . .
H12C H -0.2370 0.1071 0.8483 0.072 Uiso 1 1 calc R . .
C13 C 0.2706(7) 0.1380(3) 0.8897(7) 0.0317(11) Uani 1 1 d . . .
H13 H 0.2223 0.1287 0.9964 0.038 Uiso 1 1 calc R . .
C14 C 0.3046(8) 0.0627(3) 0.8266(8) 0.0407(12) Uani 1 1 d . . .
H14A H 0.1852 0.0261 0.7851 0.061 Uiso 1 1 calc R . .
H14B H 0.3928 0.0443 0.9299 0.061 Uiso 1 1 calc R . .
H14C H 0.3571 0.0706 0.7252 0.061 Uiso 1 1 calc R . .
C15 C 0.4590(7) 0.1968(3) 0.9573(7) 0.0410(13) Uani 1 1 d . . .
H15A H 0.4359 0.2437 0.9964 0.061 Uiso 1 1 calc R . .
H15B H 0.5127 0.2051 0.8569 0.061 Uiso 1 1 calc R . .
H15C H 0.5469 0.1786 1.0612 0.061 Uiso 1 1 calc R . .
H1O H 0.346(12) 0.256(5) 0.282(12) 0.09(3) Uiso 1 1 d . . .

loop_
_atom_site_aniso_label
_atom_site_aniso_U_11
_atom_site_aniso_U_22
_atom_site_aniso_U_33
_atom_site_aniso_U_23
_atom_site_aniso_U_13
_atom_site_aniso_U_12
Ni1 0.0284(5) 0.0290(5) 0.0253(5) 0.0016(3) 0.0090(3) 0.0065(3)
P1 0.0241(6) 0.0280(6) 0.0281(6) 0.0020(5) 0.0088(5) 0.0061(5)
P2 0.0294(7) 0.0274(6) 0.0276(6) 0.0012(5) 0.0076(5) 0.0053(5)
O1 0.052(3) 0.047(2) 0.047(2) 0.0072(18) 0.030(2) 0.008(2)
C1 0.051(3) 0.038(3) 0.032(3) -0.004(2) 0.015(2) 0.009(2)
C2 0.039(3) 0.035(3) 0.032(3) 0.001(2) 0.018(2) 0.011(2)
C3 0.033(3) 0.028(2) 0.036(3) 0.000(2) 0.015(2) 0.006(2)
C4 0.038(3) 0.031(3) 0.042(3) 0.004(2) 0.008(2) 0.014(2)
C5 0.038(3) 0.039(3) 0.058(4) 0.004(3) -0.005(3) 0.010(2)
C6 0.060(4) 0.058(4) 0.042(3) 0.018(3) 0.005(3) 0.024(3)
C7 0.039(3) 0.032(3) 0.039(3) 0.007(2) 0.016(2) 0.005(2)
C8 0.045(3) 0.028(3) 0.058(4) -0.002(2) 0.008(3) 0.002(2)
C9 0.029(3) 0.042(3) 0.057(4) 0.007(3) 0.005(3) 0.004(2)
C10 0.027(3) 0.026(2) 0.049(3) 0.000(2) 0.012(2) 0.001(2)
C11 0.034(3) 0.042(3) 0.063(4) 0.004(3) 0.001(3) 0.005(2)
C12 0.039(3) 0.047(3) 0.062(4) 0.002(3) 0.025(3) 0.004(3)
C13 0.032(3) 0.035(3) 0.031(3) 0.006(2) 0.012(2) 0.010(2)
C14 0.039(3) 0.037(3) 0.049(3) 0.011(2) 0.014(3) 0.014(2)
C15 0.036(3) 0.046(3) 0.035(3) 0.006(2) 0.001(2) 0.013(2)

_geom_special_details            
;
 All esds (except the esd in the dihedral angle between two l.s. planes)
 are estimated using the full covariance matrix.  The cell esds are taken
 into account individually in the estimation of esds in distances, angles
 and torsion angles; correlations between esds in cell parameters are only
 used when they are defined by crystal symmetry.  An approximate (isotropic)
 treatment of cell esds is used for estimating esds involving l.s. planes.
;

loop_
_geom_bond_atom_site_label_1
_geom_bond_atom_site_label_2
_geom_bond_distance
_geom_bond_site_symmetry_2
_geom_bond_publ_flag
Ni1 O1 1.877(4) . ?
Ni1 C1 1.958(5) . ?
Ni1 P1 2.1200(17) . ?
Ni1 P2 2.1769(15) . ?
P1 C10 1.847(5) . ?
P1 C13 1.864(5) . ?
P1 C2 1.860(4) . ?
P2 C7 1.838(5) . ?
P2 C3 1.843(5) . ?
P2 C4 1.857(5) . ?
C2 C3 1.541(6) . ?
C4 C5 1.525(7) . ?
C4 C6 1.526(8) . ?
C7 C8 1.533(7) . ?
C7 C9 1.532(7) . ?
C10 C12 1.524(8) . ?
C10 C11 1.524(7) . ?
C13 C15 1.524(7) . ?
C13 C14 1.532(7) . ?

loop_
_geom_angle_atom_site_label_1
_geom_angle_atom_site_label_2
_geom_angle_atom_site_label_3
_geom_angle
_geom_angle_site_symmetry_1
_geom_angle_site_symmetry_3
_geom_angle_publ_flag
O1 Ni1 C1 91.5(2) . . ?
O1 Ni1 P1 174.64(14) . . ?
C1 Ni1 P1 91.20(16) . . ?
O1 Ni1 P2 88.60(14) . . ?
C1 Ni1 P2 173.22(17) . . ?
P1 Ni1 P2 89.22(6) . . ?
C10 P1 C13 103.3(2) . . ?
C10 P1 C2 103.4(2) . . ?
C13 P1 C2 103.8(2) . . ?
C10 P1 Ni1 119.58(18) . . ?
C13 P1 Ni1 114.48(17) . . ?
C2 P1 Ni1 110.61(16) . . ?
C7 P2 C3 105.9(2) . . ?
C7 P2 C4 104.0(2) . . ?
C3 P2 C4 105.0(2) . . ?
C7 P2 Ni1 117.34(17) . . ?
C3 P2 Ni1 110.03(15) . . ?
C4 P2 Ni1 113.58(17) . . ?
C3 C2 P1 111.4(3) . . ?
C2 C3 P2 111.0(3) . . ?
C5 C4 C6 110.5(5) . . ?
C5 C4 P2 110.0(3) . . ?
C6 C4 P2 110.8(4) . . ?
C8 C7 C9 111.2(4) . . ?
C8 C7 P2 113.4(4) . . ?
C9 C7 P2 111.1(3) . . ?
C12 C10 C11 111.7(5) . . ?
C12 C10 P1 114.0(4) . . ?
C11 C10 P1 110.8(4) . . ?
C15 C13 C14 110.2(4) . . ?
C15 C13 P1 110.2(3) . . ?
C14 C13 P1 113.0(3) . . ?

_diffrn_measured_fraction_theta_max 0.999
_diffrn_reflns_theta_full        60.00
_diffrn_measured_fraction_theta_full 0.999
_refine_diff_density_max         0.834
_refine_diff_density_min         -0.773
_refine_diff_density_rms         0.105
